# Supplementary material for: Patients with Atrial Fibrillation Benefit from SAVR with Surgical Ablation Compared to TAVR Alone
Source: Springer Nature journal article supplement (doi:10.1007/s40119-022-00262-w), 2022-03-31

# Supplementary Material

## Patients With Atrial Fibrillation Benefit From SAVR With Surgical Ablation Compared To TAVR Alone

William L. Patrick, MD<sup>1,2,3</sup>, Zehang Chen BA BSN<sup>1</sup>, Jason J. Han MD<sup>1</sup>, Benjamin Smood MD<sup>1</sup>, Akhil Rao, Fabliha Khurshan BS<sup>1</sup>, Siddharth Yarlagadda BA<sup>1</sup>, Amit Iyengar MD<sup>1</sup>, John J. Kelly MD<sup>1</sup>, Joshua C. Grimm MD<sup>1</sup>, Marisa Cevasco MD MPH<sup>1</sup>, Joseph E. Bavaria MD<sup>1</sup>, Nimesh D. Desai MD PhD<sup>1,2,3</sup>

<sup>1</sup> Division of Cardiovascular Surgery, University of Pennsylvania, USA

<sup>2</sup> Leonard Davis Institute, University of Pennsylvania, Philadelphia, Pennsylvania, USA

<sup>3</sup> Penn Cardiovascular Outcomes, Quality, & Evaluative Research Center, Philadelphia, Pennsylvania, USA

### Address for Correspondence:

William L. Patrick, MD  
Division of Cardiothoracic Surgery  
University of Pennsylvania  
3400 Spruce Street  
Philadelphia, PA, 19104  
Phone 215-662-4000  
Email: [william.patrick@pennmedicine.upenn.edu](mailto:william.patrick@pennmedicine.upenn.edu)

**Supplementary Material Table 1** – Unmatched baseline characteristics of sample population

| <b>Characteristic</b> | <b>TAVR<br/>(n = 1,494)</b> | <b>SAVR-SA<br/>(n = 2,591)</b> | <b>Total<br/>(n = 4,085)</b> | <b>SMD or p-value</b> |
|-----------------------|-----------------------------|--------------------------------|------------------------------|-----------------------|
| Age - mean (SD)       | 83.6 (6.8)                  | 75.7 (6.3)                     | 78.6 (7.5)                   | 1.22                  |
| Male - n (%)          | 776 (51.9)                  | 1794 (69.3)                    | 2570 (62.9)                  | 0.36                  |
| Race - n (%)          |                             |                                |                              | 0.02                  |
| Unknown               | 3 (0.2)                     | 27 (1.0)                       | 30 (0.7)                     |                       |
| White                 | 1444 (96.7)                 | 2488 (96.0)                    | 3932 (96.3)                  |                       |
| Black                 | 21 (1.4)                    | 28 (1.1)                       | 49 (1.2)                     |                       |
| Other                 | 5 (0.3)                     | 20 (0.8)                       | 25 (0.6)                     |                       |
| Asian                 | 10 (0.7)                    | 10 (0.4)                       | 20 (0.5)                     |                       |
| Hispanic              | 8 (0.5)                     | 15 (0.6)                       | 23 (0.6)                     |                       |
| Native American       | 3 (0.2)                     | 3 (0.1)                        | 6 (0.2)                      |                       |
| Year - n (%)          |                             |                                |                              | <0.01                 |
| 2012                  | 84 (5.6)                    | 499 (19.3)                     | 583 (14.3)                   |                       |
| 2013                  | 133 (8.9)                   | 534 (20.6)                     | 667 (16.3)                   |                       |
| 2014                  | 211 (14.0)                  | 611 (23.6)                     | 822 (20.1)                   |                       |
| 2015                  | 243 (16.3)                  | 444 (17.1)                     | 687 (16.8)                   |                       |
| 2016                  | 235 (15.7)                  | 207 (8.0)                      | 442 (10.8)                   |                       |
| 2017                  | 282 (18.9)                  | 141 (5.4)                      | 423 (10.4)                   |                       |

|                                        |             |             |             |       |
|----------------------------------------|-------------|-------------|-------------|-------|
| 2018                                   | 306 (20.5)  | 155 (6.0)   | 461 (11.3)  |       |
| Preoperative comorbidities - mean (SD) |             |             |             |       |
| CHA2DS2-VASC Score                     | 3.7 (0.9)   | 3.0 (1.0)   | 3.2 (1.0)   | 0.71  |
| HAS-BLED Score                         | 1.9 (0.4)   | 1.8 (0.5)   | 1.9 (0.5)   | 0.16  |
| Elixhauser comorbidities - n (%)       |             |             |             |       |
| Blood loss anemia                      | 14 (0.9)    | 21 (0.8)    | 35 (0.9)    | 0.01  |
| Coagulopathy                           | 115 (7.7)   | 232 (9.0)   | 347 (8.5)   | -0.05 |
| Chronic pulmonary disease              | 103 (6.9)   | 233 (9.0)   | 336 (8.2)   | -0.08 |
| Depression                             | 105 (7.0)   | 182 (7.0)   | 287 (7.0)   | 0.00  |
| Deficiency anemia                      | 40 (2.7)    | 31 (1.2)    | 71 (1.7)    | 0.11  |
| Diabetes, complicated                  | 77 (5.2)    | 90 (3.5)    | 167 (4.1)   | 0.09  |
| Diabetes, uncomplicated                | 364 (24.4)  | 605 (23.4)  | 969 (23.7)  | 0.02  |
| Fluid and electrolyte disorders        | 134 (9.0)   | 197 (7.6)   | 331 (8.1)   | 0.05  |
| Hypertension, complicated              | 39 (2.6)    | 40 (1.5)    | 79 (1.9)    | 0.08  |
| Hypertension, uncomplicated            | 1281 (85.8) | 2089 (80.6) | 3370 (82.5) | 0.14  |
| Hypothyroidism                         | 317 (21.2)  | 379 (14.6)  | 696 (17.0)  | 0.18  |
| Liver disease                          | 17 (1.1)    | 36 (1.4)    | 53 (1.3)    | -0.02 |
| Other neurological disorders           | 57 (3.8)    | 78 (2.6)    | 125 (3.1)   | 0.07  |
| Obesity                                | 192 (12.9)  | 572 (22.1)  | 764 (18.7)  | -0.24 |
| Paralysis                              | 6 (0.4)     | 2 (0.1)     | 8 (0.2)     | 0.07  |

|                                         |            |            |            |       |
|-----------------------------------------|------------|------------|------------|-------|
| Pulmonary circulation disorders         | 198 (13.3) | 268 (10.3) | 466 (11.4) | 0.09  |
| Peripheral vascular disorders           | 277 (18.5) | 524 (20.2) | 801 (19.6) | -0.04 |
| Rheumatoid arthritis/collagen vascular  | 64 (4.3)   | 86 (3.3)   | 150 (3.7)  | 0.05  |
| Peptic ulcer disease excluding bleeding | 11 (0.7)   | 15 (0.6)   | 26 (0.6)   | 0.02  |
| Weight loss                             | 4 (0.3)    | 7 (0.3)    | 11 (0.3)   | 0.00  |
| Emergent or urgent admission            | 171 (11.5) | 356 (13.8) | 527 (12.9) | -0.07 |

SMD, standardized median difference (Cohen's d); SD, standard deviation

**Supplementary Material Table 2** –ICD-9 and ICD-10 codes used to specify the sample population and outcomes

| <b>Variable</b>              | <b>ICD-9-CM or ICD-9-PCS</b>                                                                                                                                                                                                                                                     | <b>ICD-10-CM or ICD-10-PCS</b>                                                                                                                                                                                                                                                      |
|------------------------------|----------------------------------------------------------------------------------------------------------------------------------------------------------------------------------------------------------------------------------------------------------------------------------|-------------------------------------------------------------------------------------------------------------------------------------------------------------------------------------------------------------------------------------------------------------------------------------|
| <b>Outcomes</b>              |                                                                                                                                                                                                                                                                                  |                                                                                                                                                                                                                                                                                     |
| Stroke                       | "43300", "43301", "43310", "43311", "43320",<br>"43321", "43330", "43331", "43380", "43381",<br>"43390", "43391", "43400", "43401", "43410",<br>"43411", "43490", "43491", "430", "431", "4320",<br>"4321", "4329"                                                               | "I6350", "I63239", "I6359", "I63119", "I63019", "I629",<br>"I659", "I6629", "I6509", "I609", "I6200", "I6529",<br>"I6320", "I6609", "I63219", "I6340", "I619", "I651",<br>"I6619", "I669", "I6322", "I6330", "I658", "I63139",<br>"I621"                                            |
| Transient ischemic<br>attack | "43300", "43301", "43310", "43311", "43320",<br>"43321", "43330", "43331", "43380", "43381",<br>"43390", "43391", "43400", "43401", "43410",<br>"43411", "43490", "43491", "43430", "431",<br>"4320", "4321", "4329", "36234", "4350", "4351",<br>"4352", "4353", "4358", "4359" | "I6350", "I63239", "I6359", "I63119", "I63019", "I629",<br>"I659", "H3400", "I6629", "I6509", "I6200", "I6529",<br>"I6320", "I6609", "I63219", "I6340", "G459", "I619",<br>"I651", "I6619", "I621", "I67848", "I669", "I6322",<br>"I6330", "I658", "I63139", "G458", "G450", "G451" |

Bleeding

"4590", "53082", "53100", "53101", "53120",  
"53121", "53140", "53141", "53160", "53161",  
"53200", "53201", "53220", "53221", "53240",  
"53241", "53260", "53261", "53300", "53301",  
"53320", "53321", "53340", "53341", "53360",  
"53361", "53400", "53401", "53420", "53421",  
"53440", "53441", "53460", "53461", "56881",  
"5693", "5780", "5781", "5789", "59970",  
"59971", "6238", "6268", "71910", "71911",  
"71912", "71913", "71914", "71915", "71916",  
"71917", "71918", "71919", "72992", "7847",  
"7848", "78630", "78639", "7847", "99811",  
"99812"

"R041", "I97631", "K661", "N99821", "N938", "R042",  
"N99820", "K250", "H59129", "M25076", "I97620",  
"J95830", "K262", "H59319", "G9752", "H59323",  
"H59312", "E89810", "E89811", "I97610", "N9961",  
"K91870", "H59122", "H9521", "I97630", "H59333",  
"M96831", "H59123", "K270", "H59111", "K91841",  
"G9731", "K264", "K56699", "K274", "H59343",  
"D7801", "M25049", "N9962", "G9761", "I97611",  
"K254", "D7832", "M2508", "K280", "M25069",  
"J95861", "K920", "K286", "H9541", "H59341",  
"H9542", "R049", "K256", "K91840", "L7622", "R58",  
"D7822", "E3602", "K625", "I97621", "R310", "N925",  
"M7981", "I97418", "I97411", "M96841", "R0489",  
"H59311", "H59313", "M25029", "H59112", "E3601",  
"H59321", "I97638", "H9551", "D7802", "L7631",  
"J9561", "H59113", "H59322", "H59119", "K272",  
"K252", "L7602", "K276", "K228", "K9162",  
"M96840", "K266", "H59342", "G9762", "M2500",  
"L7601", "N898", "H59331", "R319", "H59121",  
"L7621", "G9732", "K91871", "L7632", "N99841",  
"G9751", "M96811", "J9562", "I97410", "E89820",  
"M25059", "N931", "I9742", "H59349", "D7831",  
"M96830", "K260", "M25019", "K284", "M25039",  
"K282", "K9161", "H59339", "H59329", "E89821",  
"M96810", "D7821", "N99840", "H9552", "H9522",  
"K921", "M25073", "K922", "J95860", "I97618",  
"R040", "H59332", "J95831"

Permanent  
pacemaker  
implantation

"3781", "3782", "3783", "3794", "0050", "051"

"0JH634Z", "0JPT3PZ", "0JPT0PZ", "0JH837Z",  
"0JH635Z", "02H43JZ", "0JH806Z", "02HK3KZ",  
"0JH836Z", "0JH607Z", "0JH636Z", "0JH807Z",  
"0JH606Z", "0JH605Z", "0JH835Z", "0JH804Z",  
"02HN0JZ", "02H64KZ", "0JH604Z", "02PA3MZ",

"02HK4KZ", "02HK3JZ", "0JH637Z", "02H63KZ",  
"02H63JZ", "02HN4JZ", "0JH834Z", "0JH805Z"

Rehospitalization "42731", "42732", "4270"

"I4891", "I4892", "I471"

for atrial arrhythmia

Rehospitalization "39891", "40201", "40211", "40291", "40401",  
for heart failure "40411", "40491", "40403", "40413", "40493",  
"4280", "4281", "42820", "42821", "42822",  
"42823", "42830", "42831", "42832", "42833",  
"42840", "42841", "42842", "42843", "4289"

"I5082", "I5041", "I50813", "I509", "I5033", "I5043",  
"I5084", "I5042", "I5030", "I501", "I130", "I50814",  
"I5089", "I5031", "I5020", "I5083", "I5040", "I50812",  
"I5021", "I5022", "I110", "I5023", "I5032", "I50810",  
"I50811", "I0981", "I132"

Sepsis

"038", "995.91", "995.92", "785.52"

"A409", "A412", "A4101", "A4102", "A411", "A403",  
"A414", "A4150", "A413", "A4151", "A4152",  
"A4153", "A4159", "A4189", "A419", "A419",  
"R6520", "R6521"

### Principle selection criteria

Atrial fibrillation "42731"

"I4891", "I48.0", "I48.1", "I48.2"

Heart or lung "3751", "3752", "3753", "3754", "335", "336",  
transplant "3350", "3351", "3352"

"0BYL0Z0", "0BYM0Z2", "0BYL0Z2", "0BYG0Z1",  
"02RL0JZ", "0BYD0Z1", "0BYG0Z2", "0BYG0Z0",  
"0BYC0Z2", "0BYK0Z2", "02RK0JZ", "02YA0Z0",  
"0BYF0Z1", "02YA0Z1", "0BYH0Z0", "0BYH0Z1",  
"0BYC0Z0", "0BYF0Z0", "0BYC0Z1", "0BYJ0Z2",  
"0BYD0Z0", "0BYF0Z2", "0BYH0Z2", "02YA0Z2",  
"02WA0JZ", "0BYK0Z0", "0BYM0Z1", "0BYJ0Z1",  
"0BYL0Z1", "0BYK0Z1", "0BYM0Z0", "0BYD0Z2",  
"0BYJ0Z0"

Major  
cardiovascular  
procedures

"3507", "3508", "3509", "3510", "3511", "3512",  
"3513", "3514", "3520", "3523", "3524", "3525",  
"3526", "3527", "3528", "3541", "3542", "3581",  
"3582", "3583", "3584", "3591", "3592", "3593",  
"3594", "3595", "3596", "3597", "3598", "3599",  
"3603", "3606", "3607", "3609", "3610", "3611",  
"3612", "3613", "3614", "3615", "3616", "3617",  
"3619", "3741", "3751", "3752", "3753", "3754",  
"3755", "3810", "3811", "3812", "3813", "3814",  
"3815", "3816", "3818", "3971", "3972", "3973",  
"3974", "3975", "3976", "3978", "3990"  
"02124KC", "02B50ZZ", "021K4JR", "02104K9",  
"04C33ZZ", "02RJ3JH", "04CP4ZZ", "03CB3ZZ",  
"02170ZT", "02170AT", "024F07J", "03LS0DZ",  
"02WF4JZ", "02LS0ZZ", "021608R", "02120AC",  
"02LH4ZZ", "02100K9", "04CB4ZZ", "021709S",  
"02164JP", "03CN4ZZ", "02164JQ", "02170KT",  
"03CS0ZZ", "03CF4ZZ", "02RG37H", "021049F",  
"02RF4KZ", "021V08S", "02170JT", "02WJ48Z",  
"02RJ4JZ", "02114K9", "03LM3DZ", "02QA3ZZ",  
"02174KU", "02100JF", "02UA4JZ", "02124AW",  
"04CD3ZZ", "04V03DZ", "021V0ZS", "03LN4DZ",  
"03C13ZZ", "04CW3ZZ", "02170ZP", "04CE4ZZ",  
"02120JW", "03C14ZZ", "02170JU", "021K09R",  
"02160ZP", "021009F", "021008F", "02CP4ZZ",  
"03CB0ZZ", "021608P", "04CT3ZZ", "02VW4DZ",  
"02WH47Z", "04CW4ZZ", "02WG48Z", "02Q53ZZ",  
"0211098", "02110K8", "021K0ZP", "02WJ37Z",  
"03LP4DZ", "02104JC", "02QA0ZZ", "02RJ08Z",  
"02100J3", "02UW4JZ", "021748S", "021V4KT",  
"03C74ZZ", "03LN3BZ", "03LN0BZ", "04CC0ZZ",  
"03CD0ZZ", "02RG07Z", "02LH4CZ", "02SX0ZZ",  
"0210089", "02114Z8", "03LS4DZ", "021349W",  
"021V4AS", "02134JC", "02WJ07Z", "02CW3ZZ",  
"03CM0ZZ", "02WG4JZ", "03VL0DZ", "03VG4BZ",  
"02YA0Z2", "021708S", "021708U", "02134JW",  
"0210098", "03LT0DZ", "04V00DZ", "04C04ZZ",  
"04CR4ZZ", "02CT3ZZ", "03C53ZZ", "03C03ZZ",  
"021K49P", "03CN0ZZ", "03VS4DZ", "02114Z9",  
"03VJ4DZ", "02LH3DZ", "03VJ3BZ", "02VW0DZ",  
"03VQ3BZ", "02VX4FZ", "03C23ZZ", "021V09S",  
"04CC3ZZ", "021V09T", "02WH3KZ", "03CL0ZZ",  
"02RH47Z", "021K09Q", "02130KC", "04CK3ZZ",  
"0210083", "03LS3DZ", "03CS4ZZ", "02RQ07Z",



"02CV0ZZ", "02QJ0ZG", "02NJ0ZZ", "02VG4ZZ",  
"02RG0KZ", "03LG4BZ", "02QH0ZZ", "02100J8",  
"02100AW", "03CP3ZZ", "02YA0Z1", "03VJ0BZ",  
"0211498", "02CT0ZZ", "02114A9", "03VU3DZ",  
"02RG3JH", "04CB3ZZ"

"02VW4EZ", "03C04ZZ", "02104A9", "021108C",  
"03LG3DZ", "021V4JU", "02C33ZZ", "021608Q",  
"02104J3", "04C84ZZ", "02QF0ZZ", "02CR4ZZ",  
"03C20ZZ", "02120AW", "02WH0JZ", "02RF37Z",  
"03LH3DZ", "02130JW", "04CW0ZZ", "02RG08Z",  
"03VS0DZ", "02174JU", "04CL4ZZ", "0210099",  
"02170AS", "02RG47Z", "03LR3DZ", "03VV3DZ",  
"02CR3ZZ", "02RH48Z", "021K4KP", "021308C",  
"04CS3ZZ", "02U70JZ", "021K0JR", "02RH38Z",  
"02110Z8", "02NF0ZZ", "02VW3DZ", "02RG4KZ",  
"02WH07Z", "03VU0DZ", "02RJ4KZ", "021K4AP",  
"02120JC", "03VH0DZ", "021048W", "02104J8",  
"04CH0ZZ", "02NG0ZZ", "02RJ48Z", "02160AP",  
"021V0KS", "03VS3DZ", "02BK0ZZ", "02160JQ",  
"02100ZF", "021K09P", "04CM0ZZ", "03CP0ZZ",  
"021K4AR", "027G3ZZ", "02110Z9", "02WF0KZ",  
"03LG0BZ", "04C50ZZ", "021K0JP", "02114J8",  
"02170KS", "021K49Q", "04CF4ZZ", "02730ZZ"

"02174KS", "04C23ZZ", "021248C", "02174AS",  
"02RF38Z", "04CN0ZZ", "04CP3ZZ", "02WF38Z",  
"02160KP", "02130JC", "04CK0ZZ", "02VW0FZ",  
"0210088", "02174AT", "03VV4DZ", "02CQ0ZZ",  
"027G0DZ", "03CH3ZZ", "0211099", "03LR4DZ",  
"03CT3ZZ", "03VK3DZ", "04C43ZZ", "021109W",  
"03LG4DZ", "02RJ37Z", "02S10ZZ", "021649P",  
"03C40ZZ", "04C94ZZ", "021209C", "02134KC",  
"02VX4EZ", "021708T", "021049W", "03VH4DZ",  
"03LP3DZ", "0210483", "03C54ZZ", "02QG4ZE",  
"03LL4BZ", "02RH3JH", "02WH37Z", "027F0DZ",  
"02114KW", "02164ZQ", "02170ZS", "02WG37Z",  
"02U50JZ", "02104Z3", "02C13ZZ", "02VX4DZ",  
"0211088", "02110AW", "02164AQ", "02114A8",  
"03CJ3ZZ", "04C03ZZ", "03LJ3BZ", "021V4KU",  
"02LH0DZ", "03LK0BZ", "021648P", "03VM3DZ",  
"021V48U", "021K0AQ", "02YA0Z0", "02160JR",  
"02CV4ZZ", "02RH08Z", "03LN4BZ", "02RH0KZ",  
"02WJ0KZ", "03CJ0ZZ", "04CN3ZZ", "03LQ0DZ",  
"03CQ4ZZ", "04V03EZ"  
"03CV3ZZ", "021K0AP", "0211488", "02UA3JZ",  
"02W54JZ", "021349C", "04CY0ZZ", "02104JW",  
"02RH37Z", "03CK3ZZ", "02164KP", "027J3ZZ",  
"02124JC", "04C64ZZ", "021V4ZU", "02114J9",  
"03CT4ZZ", "021V0AS", "03VJ4BZ", "03VL3BZ",  
"03VP3DZ", "02WJ08Z", "027G4ZZ", "02WF47Z",  
"02QJ0ZZ", "04C20ZZ", "04CV3ZZ", "03LH4DZ",  
"02VW4FZ", "04U04JZ", "02RH3JZ", "04C13ZZ",  
"02WG4KZ", "03CJ4ZZ", "02CX0ZZ", "04V04DZ",  
"021V08U", "02UW3JZ", "04CC4ZZ", "02WM0JZ",  
"02C23ZZ", "02134ZC", "03VN4BZ", "03VM4DZ",  
"021V4ZS", "04CT0ZZ", "03VT4DZ", "0210488",  
"02104AW", "02110AC", "02104K8", "02110A8",

"027H0ZZ", "03CM4ZZ", "03CA0ZZ", "021K4AQ",  
"02LH4DZ", "04C70ZZ", "021149W", "03LJ0DZ",  
"02100Z3", "03CH0ZZ", "02CQ3ZZ", "03VL3DZ",  
"03CA3ZZ", "04C53ZZ", "03LQ0BZ", "02UX4JZ",  
"021749S", "021208C", "02UG3JZ", "021V08T"

"02WF4KZ", "02104ZF", "03VQ0DZ", "02VX0DZ",  
"021K4JP", "03VH0BZ", "04CA3ZZ", "021V4JT",  
"02RH3KZ", "03CM3ZZ", "03VN3DZ", "02160JP",  
"04CH3ZZ", "02100ZC", "04C00ZZ", "03LK3DZ",  
"03CY3ZZ", "04V00EZ", "03VK0BZ", "03VQ4BZ",  
"02RF07Z", "02110J9", "02RG4JZ", "021709T",  
02120KW", "021V0ZU", "02160KQ", "03VP4BZ",  
"02Q54ZZ", "03CA4ZZ", "02WF0JZ", "03LN3DZ",  
"03VU4DZ", "02VG0ZZ", "02UA0JZ", "0210498",  
"02WH08Z", "02QG0ZE", "02QJ3ZG", "02114K8",  
"02VX0EZ", "02RP0JZ", "02130ZC", "03CG4ZZ",  
"03VH3BZ", "021V49S", "027H4ZZ", "02CS4ZZ",  
"02SP0ZZ", "021609R", "04CS4ZZ", "03LL3DZ",  
"03VH3DZ", "02RJ3JZ", "021K0ZR", "02174AU",  
"021008W", "021K0KR", "02CW0ZZ", "02RJ07Z",  
"04CF0ZZ", "04CK4ZZ", "024F0KJ", "04U03JZ",  
"021749U", "03CG3ZZ", "03CU4ZZ", "03VT3DZ",  
"021V09U", "021K4KR", "021048C", "02160ZR",  
"02130AC", "03VH4BZ", "021348C", "02RJ0JZ",  
"027J0ZZ", "021009C"

021V48T", "021V0ZT", "02VX3DZ", "02RJ0KZ",  
"02114AC", "03VM4BZ", "021308W", "03VG3DZ",  
"02160KR", "021V49T", "03LM4DZ", "03LM4BZ",  
"03C10ZZ", "02CW4ZZ", "03VL4BZ", "02B54ZZ",  
"02RH07Z", "02C10ZZ", "027H04Z", "03C00ZZ",  
"03CC0ZZ", "02RG3JZ", "04C14ZZ", "021609Q",  
"02120KC", "03VQ4DZ", "02100KF", "021648R",  
"02C03ZZ", "03C60ZZ", "03LJ4DZ", "03CB4ZZ",  
"021309W", "03VL0BZ", "03LQ3DZ", "03VG0DZ",  
"02104AC", "021748U", "02100K8", "02WF3KZ",  
"02WJ47Z", "04C34ZZ", "04CY3ZZ", "04C60ZZ",  
"02174JT", "04C24ZZ", "03VR4DZ", "03C30ZZ",  
"02CS0ZZ", "02160ZQ", "02CS3ZZ", "02114JW",  
"02174ZU", "02WM4JZ", "03CL4ZZ", "03LL3BZ",  
"02LR0ZT", "03LP0BZ", "02WG38Z", "02QF3ZJ",  
"02C30ZZ", "02WG47Z", "04CQ4ZZ", "03VR3DZ",  
"02174ZS", "03VN0BZ", "02RJ47Z", "021K48Q",  
"02164AR", "04CF3ZZ", "03LH0DZ", "03LL4DZ",  
"02RF48Z", "03CN3ZZ", "02164KQ", "02720ZZ",  
"03CR3ZZ", "02WG08Z"

"02LH3CZ", "03LL0DZ", "04CE3ZZ", "02WJ0JZ",  
"02RJ38H", "021149C", "03VR0DZ", "021K4KQ",  
"027J4ZZ", "021V4KS", "03VM0BZ", "02100K3",  
"03CV4ZZ", "03VG4DZ", "02RJ37H", "02RH0JZ",  
"03LT4DZ", "04C73ZZ", "02134AC", "02VX3FZ",  
"03CC3ZZ", "021K4ZR", "02104Z9", "02100AC",  
"02C34ZZ", "0211489", "03C70ZZ", "02114AW",  
"03LM0DZ", "02RJ3KH", "02100A8", "02114ZC",  
"03VP3BZ", "02RH37H", "021K48R", "02WJ4KZ",  
"03CK0ZZ", "02170KU", "02124KW", "03CR0ZZ",  
"02110K9", "02160AQ", "021V4AU", "04C54ZZ",  
"02RM0JZ", "02RF4JZ", "03C63ZZ", "02RH38H",  
"02RF0JZ", "04CQ0ZZ", "04CQ3ZZ", "03C80ZZ",  
"02130KW", "03LH0BZ", "021K08Q", "03LG0DZ",  
"021K4ZQ", "02LH3ZZ", "04V04EZ",  
"02164ZP", "02170ZU", "03CU0ZZ", "02WF37Z",  
"02164AP", "02WH4JZ", "03CR4ZZ", "03VJ0DZ",  
"0210489", "03CK4ZZ", "04C80ZZ", "02WJ3KZ",  
"024F0JJ", "04CR0ZZ", "03VL4DZ", "021K08P",  
"021K0JQ", "021K4JQ", "04CP0ZZ"

"03VQ3DZ", "021108W", "027G0ZZ", "02160AR",  
"03CY4ZZ", "027J0DZ", "02110ZC", "021L4ZW",  
"02104Z8", "03CG0ZZ", "02RG3KH",  
"021649Q", "02124ZC", "0211089", "02VX0FZ",  
"03CD3ZZ", "021208W", "02100AF", "02C20ZZ",  
"04CR3ZZ", "02RL0JZ", "04CM4ZZ", "02RF3JZ",  
"02RH3KH", "03C24ZZ", "021K0KP", "03CT0ZZ",  
"027G04Z", "03VK4BZ", "02LH0ZZ", "02WJ4JZ",  
"02C04ZZ", "03CV0ZZ", "04CJ0ZZ", "02S00ZZ",  
"02174ZT", "02VW3EZ", "021709U", "03C83ZZ",  
"02170ZQ", "02RK0JZ", "04CV4ZZ", "02100Z8",  
"04CV0ZZ", "02CQ4ZZ", "03VV0DZ", "02710ZZ",  
"03C34ZZ", "021649R", "02100A9", "021248W",  
"02104JF", "04C83ZZ", "04CB0ZZ", "04CU0ZZ",  
"03C93ZZ", "04C93ZZ", "03CH4ZZ", "02QJ4ZG",  
"02100A3", "03C50ZZ", "03CL3ZZ", "02170AU",  
"02VG3ZZ", "03LJ3DZ", "021V0AU", "02WJ38Z",  
"03C33ZZ", "03LH4BZ", "02CR0ZZ", "02C14ZZ",  
"02104K3", "02164KR", "027J04Z", "02174KT",  
"02WG3JZ", "02174JS", "021K0KQ", "021249C",  
"04CD4ZZ", "02C24ZZ", "02W50JZ", "03LP4BZ",  
"027H3ZZ"

"04CA0ZZ", "02104KC", "04CJ4ZZ", "021K48P",  
"02104A3", "024F08J", "02WJ3JZ", "03LN0DZ",  
"02100Z9", "03LH3BZ", "04CU3ZZ",  
"021K4ZP", "0211499", "02100JW", "02RF08Z",  
"027F0ZZ", "021348W", "021V0AT", "02C00ZZ",  
"02B53ZZ", "04CA4ZZ", "021008C", "04C10ZZ",  
"02RF3KZ", "03LK0DZ", "03CQ0ZZ", "02WG0JZ",  
"021V0KU", "02RG0JZ", "04CT4ZZ", "02170ZR",  
"02RG3KZ", "03VP0DZ", "02WF3JZ", "03LK3BZ",  
"02104AF", "03LJ0BZ", "02CX3ZZ", "021049C",  
"02WH4KZ", "021V0JT", "02QG0ZZ", "02RG38Z",  
"04C74ZZ", "02RG38H", "02WF48Z", "02WH0KZ",  
"02WH48Z", "03C43ZZ", "021009W", "02CV3ZZ",  
"021109C", "04C44ZZ", "02CP3ZZ", "04V00FZ",  
"02RJ3KZ", "0210499", "021V0JS", "02RF0KZ",  
"02104J9", "02104ZC", "02RF47Z", "02SW0ZZ",  
"02WG07Z", "02RR0JZ", "03LT3DZ", "03VN4DZ",  
"021K0AR", "04C63ZZ", "02104KW", "03VT0DZ",  
"021249W"  
"02120ZC", "03VP4DZ", "02104KF", "03C64ZZ",  
"02VW0EZ", "021V0KT", "02100KC", "03CQ3ZZ",  
"02WH38Z", "021V4ZT", "03LP3BZ",  
"03CD4ZZ", "027F3ZZ", "02RH4KZ", "03C84ZZ",  
"02700ZZ", "04V03FZ", "03VJ3DZ", "02110JC",  
"02VR0ZT", "02100J9", "02WF08Z", "04CL0ZZ",  
"04CS0ZZ", "04V04FZ", "02QG3ZE", "02Q50ZZ",  
"03C73ZZ", "02QF4ZJ", "027F04Z", "02RQ0JZ",  
"021209W", "021748T", "021V4AT", "02124AC",  
"021V0JU", "021K0ZQ", "03CY0ZZ", "03VK3BZ",  
"02WF07Z", "02110KC", "02114KC", "02RH4JZ",  
"02100JC", "02PA0JZ", "02RR07Z", "04CN4ZZ",  
"021K49R", "02164JR", "03CF0ZZ", "03VM0DZ",  
"03LM0BZ", "04CU4ZZ", "02170JS", "03LL0BZ",

"03VG3BZ", "02134AW", "03LG3BZ", "027F4ZZ",  
"03LJ4BZ", "02QF0ZJ", "021309C", "03C90ZZ",  
"03VQ0BZ", "02110KW", "02WA0JZ", "021048F",  
"03LQ4DZ", "02QM4ZZ", "0210493", "04CY4ZZ",  
"04CD0ZZ"

"03VG0BZ", "02WH3JZ", "03C94ZZ", "021148W",  
"03CC4ZZ", "04C30ZZ", "02100KW", "04CM3ZZ",  
"02LT0ZZ", "021648Q", "021V48S",  
"03LK4BZ", "03VN3BZ", "02WG3KZ", "02VX3EZ",  
"021K08R", "03LK4DZ", "03VP0BZ", "02QM0ZZ",  
"04C90ZZ", "04CJ3ZZ", "021V4JS", "03VM3BZ",  
"02WG0KZ", "02CP0ZZ", "02110JW", "02110J8",  
"021749T", "021L0ZW", "02UX3JZ", "021148C",  
"03CP4ZZ", "02CX4ZZ", "03LQ3BZ", "02RJ38Z",  
"03VK0DZ", "02NH0ZZ", "03CU3ZZ", "02110A9",  
"02CT4ZZ", "02LH0CZ", "021609P", "02QA4ZZ",  
"03LR0DZ", "021V49U", "02130AW", "03VN0DZ",  
"02164ZR", "03LQ4BZ", "04CH4ZZ", "02124JW",  
"02104A8", "03LM3BZ", "04C40ZZ", "0210093",  
"02134KW", "03VK4DZ", "03LP0DZ", "03C44ZZ",  
"02VW3FZ", "02114JC", "02QM3ZZ", "03CS3ZZ",  
"02RG37Z", "03CF3ZZ", "04CE0ZZ", "027H0DZ",  
"04CL3ZZ", "02RG48Z"



|                                                                          |                                                                                                                                      |                                                                                                                                                                                                                                                                                                     |
|--------------------------------------------------------------------------|--------------------------------------------------------------------------------------------------------------------------------------|-----------------------------------------------------------------------------------------------------------------------------------------------------------------------------------------------------------------------------------------------------------------------------------------------------|
| Prior surgical or<br>endovascular<br>ablation                            | "3733", "3734", "3737"                                                                                                               | "02BL3ZZ", "02B60ZZ", "02563ZZ", "025K0ZZ",<br>"02BL4ZZ", "02BK0ZZ", "025L4ZZ", "02564ZZ",<br>"02560ZZ", "02573ZZ", "02T80ZZ",<br>"025L0ZZ", "02BK3ZZ", "02B73ZZ", "02570ZZ",<br>"02BL0ZZ", "02B74ZZ", "025K4ZZ", "025K3ZZ",<br>"025L3ZZ", "02B70ZZ", "02B63ZZ", "02B64ZZ",<br>"02574ZZ", "02BK4ZZ" |
| Prior left atrial<br>appendage excision,<br>destruction, or<br>exclusion | "3736", "3790"                                                                                                                       | "02L73CK", "02L73DK", "02L74CK", "02L70CK",<br>"02L73ZK", "02573ZK", "02L74ZK", "02B73ZK",<br>"02L70ZK", "02574ZK", "02B70ZK", "02570ZK",<br>"02B74ZK", "02L70DK", "02L74DK"                                                                                                                        |
| Mitral valve disease                                                     | "7466", "3941", "3962", "3963", "3940", "3960",<br>"3961", "7465", "3940", "3960", "3961", "7465",<br>"3949", "3968", "3969", "4240" | "Q233", "I051", "I080", "I050", "I080", "Q232", "I050",<br>"I080", "Q232", "I058", "I089", "I348", "I340", "I088"                                                                                                                                                                                   |
| Tricuspid valve<br>disease                                               | "3970"                                                                                                                               | "I071", "I072", "I078"                                                                                                                                                                                                                                                                              |

---

**Supplementary Material Table 3** – Full description of matched Cox proportional-hazards model with and without multivariable regression for all-cause mortality.

| <b>Model</b>                                                                | <b>Hazard ratio (95% CI)</b> | <b>p - value</b> |
|-----------------------------------------------------------------------------|------------------------------|------------------|
| <i>Matched Cox proportional-hazards model</i>                               |                              |                  |
| SAVR-SA                                                                     | 0.61 (0.50 - 0.73)           | <0.01            |
| <i>Matched Cox proportional-hazards model with multivariable regression</i> |                              |                  |
| SAVR-SA                                                                     | 0.65 (0.53 - 0.79)           | <0.01            |
| Age                                                                         | 1.05 (1.03 - 1.07)           | <0.01            |
| CHA2DS2-VASC Score                                                          | 1.09 (0.97 - 1.21)           | 0.15             |

**Supplementary Material Table 4** – Full description of matched Cox proportional-hazards model with and without multivariable regression for stroke.

| <b>Model</b>                                                                | <b>Hazard ratio (95% CI)</b> | <b>p - value</b> |
|-----------------------------------------------------------------------------|------------------------------|------------------|
| <i>Matched Cox proportional-hazards model</i>                               |                              |                  |
| SAVR-SA                                                                     | 1.00 (0.70 -1.43)            | 1.00             |
| <i>Matched Cox proportional-hazards model with multivariable regression</i> |                              |                  |
| SAVR-SA                                                                     | 1.07 (0.74 – 1.54)           | 0.72             |
| Age                                                                         | 1.02 (1.00 – 1.05)           | 0.08             |
| CHA2DS2-VASC Score                                                          | 1.35 (1.12 – 1.63)           | <0.01            |

**Supplementary Material Table 5** – Full description of matched Cox proportional-hazards model with and without multivariable regression for transient ischemic attack.

| <b>Model</b>                                                                | <b>Hazard ratio (95% CI)</b> | <b>p - value</b> |
|-----------------------------------------------------------------------------|------------------------------|------------------|
| <i>Matched Cox proportional-hazards model</i>                               |                              |                  |
| SAVR-SA                                                                     | 0.98 (0.70 – 1.36)           | 0.89             |
| <i>Matched Cox proportional-hazards model with multivariable regression</i> |                              |                  |
| SAVR-SA                                                                     | 1.05 (0.75 – 1.47)           | 0.79             |
| Age                                                                         | 1.02 (1.00 – 1.05)           | 0.09             |
| CHA2DS2-VASC Score                                                          | 1.39 (1.18 – 1.65)           | <0.01            |

**Supplementary Material Table 6** – Full description of matched Cox proportional-hazards model with and without multivariable regression for pacemaker implantation.

| <b>Model</b>                                                                | <b>Hazard ratio (95% CI)</b> | <b>p - value</b> |
|-----------------------------------------------------------------------------|------------------------------|------------------|
| <i>Matched Cox proportional-hazards model</i>                               |                              |                  |
| SAVR-SA                                                                     | 0.60 (0.44 – 0.83)           | <0.01            |
| <i>Matched Cox proportional-hazards model with multivariable regression</i> |                              |                  |
| SAVR-SA                                                                     | 0.62 (0.44 – 0.87)           | <0.01            |
| Age                                                                         | 1.02 (0.98 – 1.05)           | 0.30             |
| CHA2DS2-VASC Score                                                          | 0.98 (0.82 – 1.17)           | 0.83             |

**Supplementary Material Table 7** – Full description of matched Cox proportional-hazards model with and without multivariable regression for bleeding.

| <b>Model</b>                                                                | <b>Hazard ratio (95% CI)</b> | <b>p - value</b> |
|-----------------------------------------------------------------------------|------------------------------|------------------|
| <i>Matched Cox proportional-hazards model</i>                               |                              |                  |
| SAVR-SA                                                                     | 0.61 (0.39 – 0.96)           | 0.03             |
| <i>Matched Cox proportional-hazards model with multivariable regression</i> |                              |                  |
| SAVR-SA                                                                     | 0.63 (0.39 – 1.01)           | 0.05             |
| Age                                                                         | 1.01 (0.98 – 1.04)           | 0.41             |
| CHA2DS2-VASC Score                                                          | 1.08 (0.87 – 1.35)           | 0.48             |

**Supplementary Material Table 8** – Full description of matched Cox proportional-hazards model with and without multivariable regression for rehospitalization for atrial arrhythmia (landmarked at 180 days).

| <b>Model</b>                                                                | <b>Hazard ratio (95% CI)</b> | <b>p - value</b> |
|-----------------------------------------------------------------------------|------------------------------|------------------|
| <i>Matched Cox proportional-hazards model</i>                               |                              |                  |
| SAVR-SA                                                                     | 0.85 (0.65 – 1.11)           | 0.24             |
| <i>Matched Cox proportional-hazards model with multivariable regression</i> |                              |                  |
| SAVR-SA                                                                     | 0.91 (0.68 – 1.21)           | 0.50             |
| Age                                                                         | 1.05 (1.02 – 1.08)           | <0.01            |
| CHA2DS2-VASC Score                                                          | 0.98 (0.86 – 1.11)           | 0.72             |

**Supplementary Material Table 9** – Full description of matched Cox proportional-hazards model with and without multivariable regression for rehospitalization for heart failure (landmarked at 180 days).

| <b>Model</b>                                                                | <b>Hazard ratio (95% CI)</b> | <b>p - value</b> |
|-----------------------------------------------------------------------------|------------------------------|------------------|
| <i>Matched Cox proportional-hazards model</i>                               |                              |                  |
| SAVR-SA                                                                     | 0.47 (0.35 – 0.62)           | <0.01            |
| <i>Matched Cox proportional-hazards model with multivariable regression</i> |                              |                  |
| SAVR-SA                                                                     | 0.49 (0.36 – 0.65)           | <0.01            |
| Age                                                                         | 1.02 (0.99 – 1.04)           | 0.18             |
| CHA2DS2-VASC Score                                                          | 1.26 (1.10 – 1.43)           | <0.01            |



**Supplementary Material Table 10** – Full description of matched Cox proportional-hazards model with and without multivariable regression for rehospitalization for sepsis (landmarked at 180 days).

| <b>Model</b>                                                                | <b>Hazard ratio (95% CI)</b> | <b>p - value</b> |
|-----------------------------------------------------------------------------|------------------------------|------------------|
| <i>Matched Cox proportional-hazards model</i>                               |                              |                  |
| SAVR-SA                                                                     | 1.13 (0.82 – 1.55)           | 0.45             |
| <i>Matched Cox proportional-hazards model with multivariable regression</i> |                              |                  |
| SAVR-SA                                                                     | 1.18 (0.84 – 1.65)           | 0.33             |
| Age                                                                         | 1.03 (1.00 – 1.07)           | 0.12             |
| CHA2DS2-VASC Score                                                          | 1.07 (0.89 – 1.28)           | 0.49             |

**Supplementary Material Figure 1 – Generalized boosted regression model optimization**

Parameters:

- Number of trees = 3,000
- Interaction depth = 3
- Shrinkage = 0.01

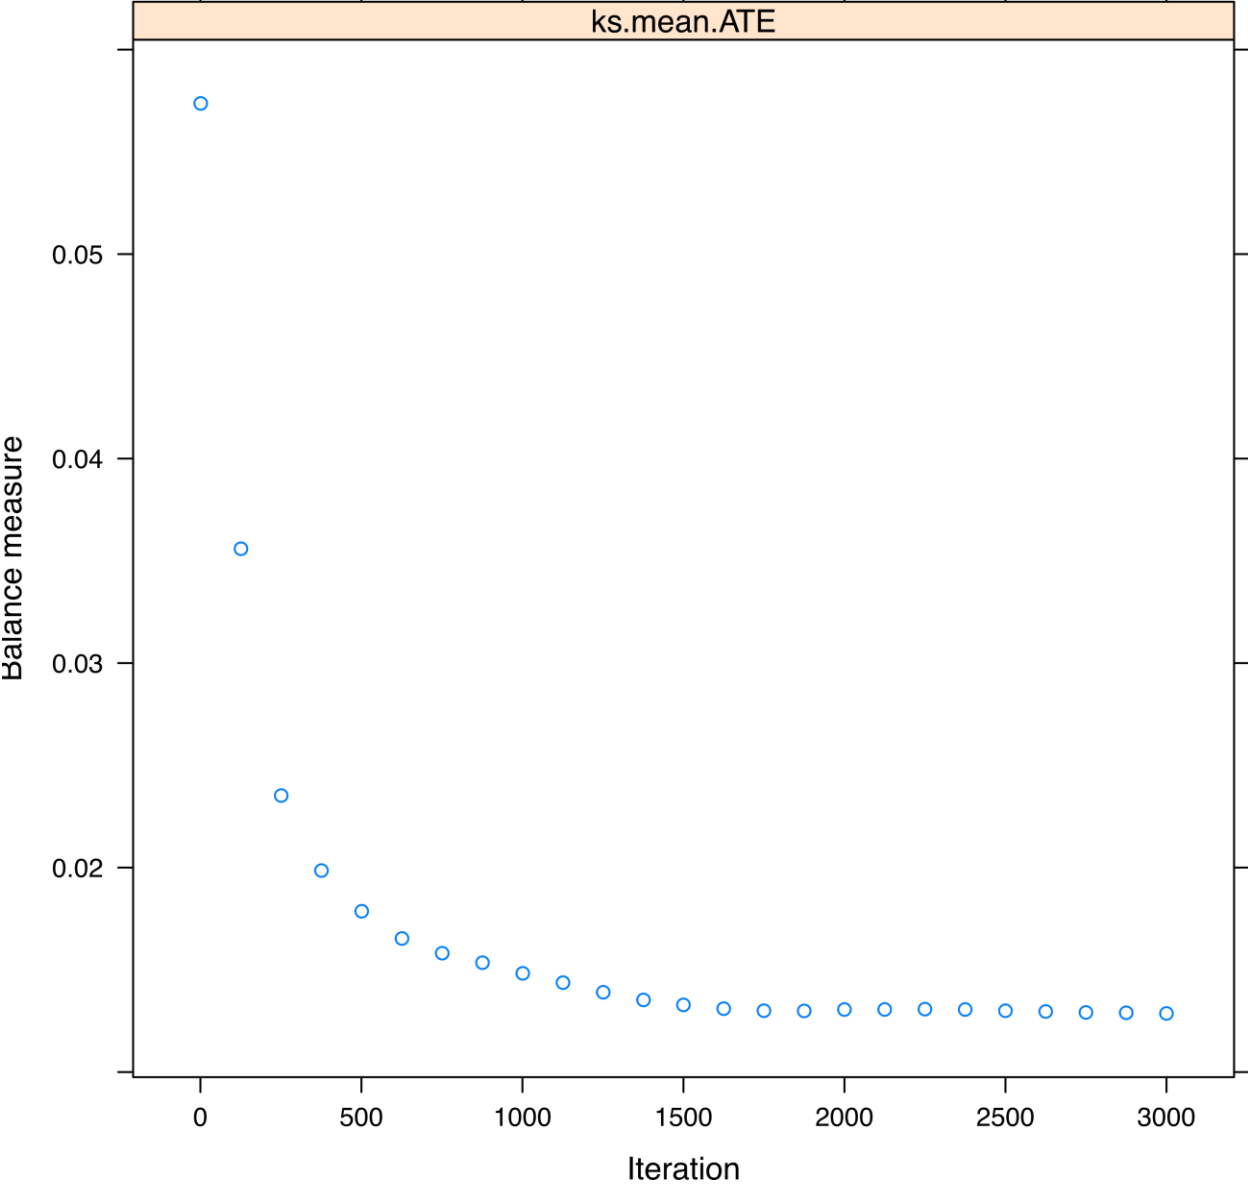

**Supplementary Material Figure 2** – Boxplot of propensity score generated from the boosted regression model where 2 = TAVR and 1 = SAVR-SA.

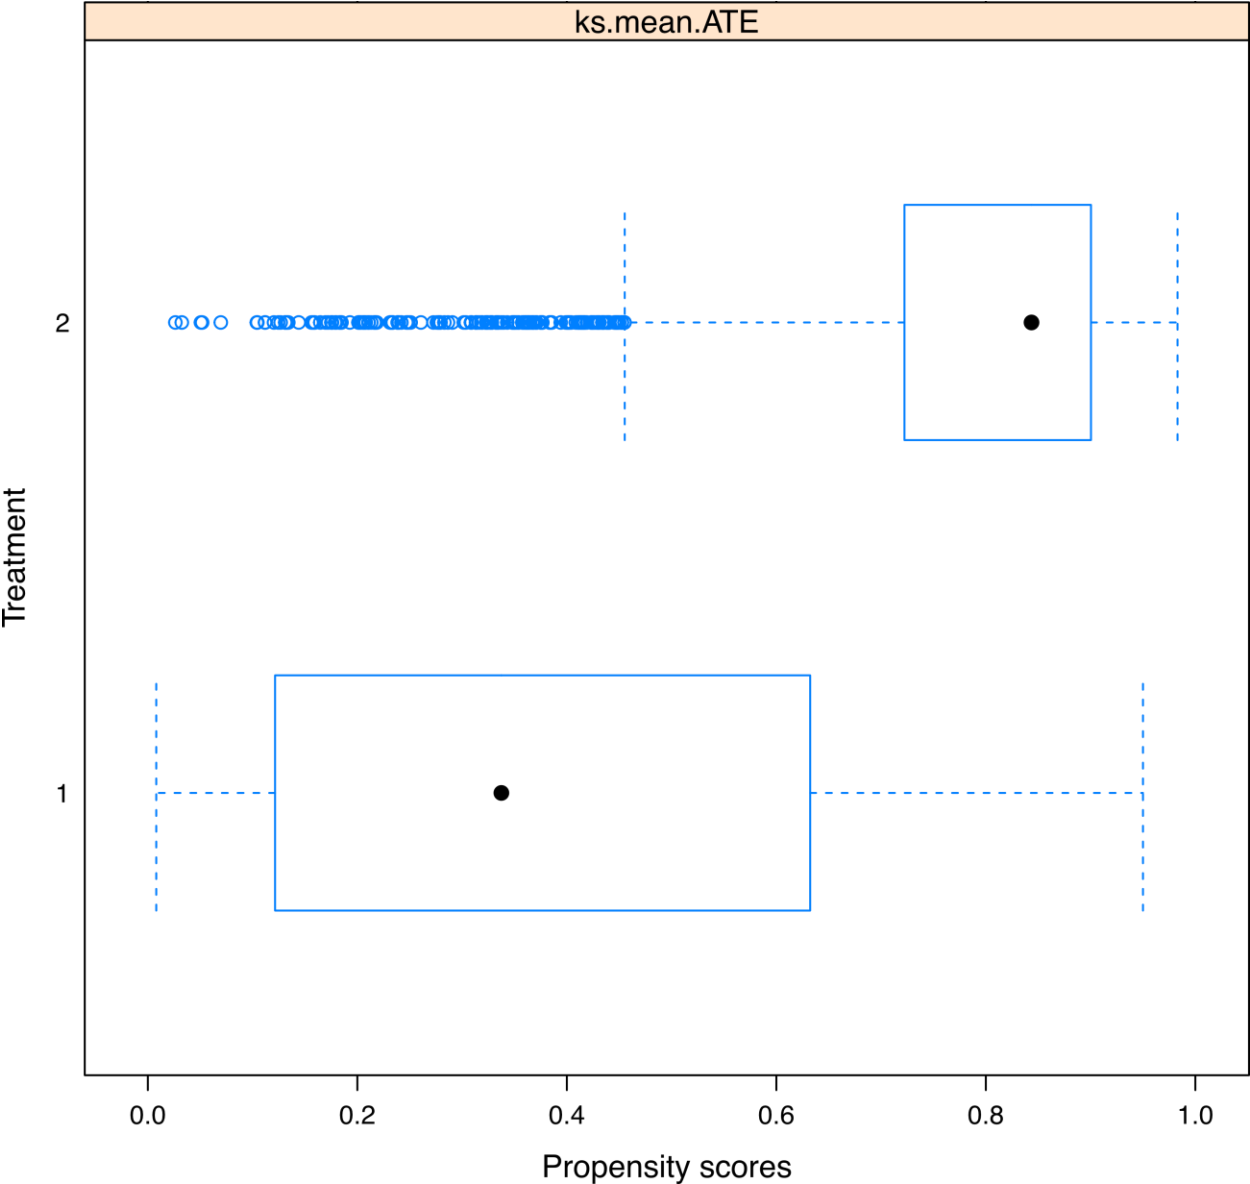

Supplementary Material Figure 3 – Standardized effect sizes before and after weighting.

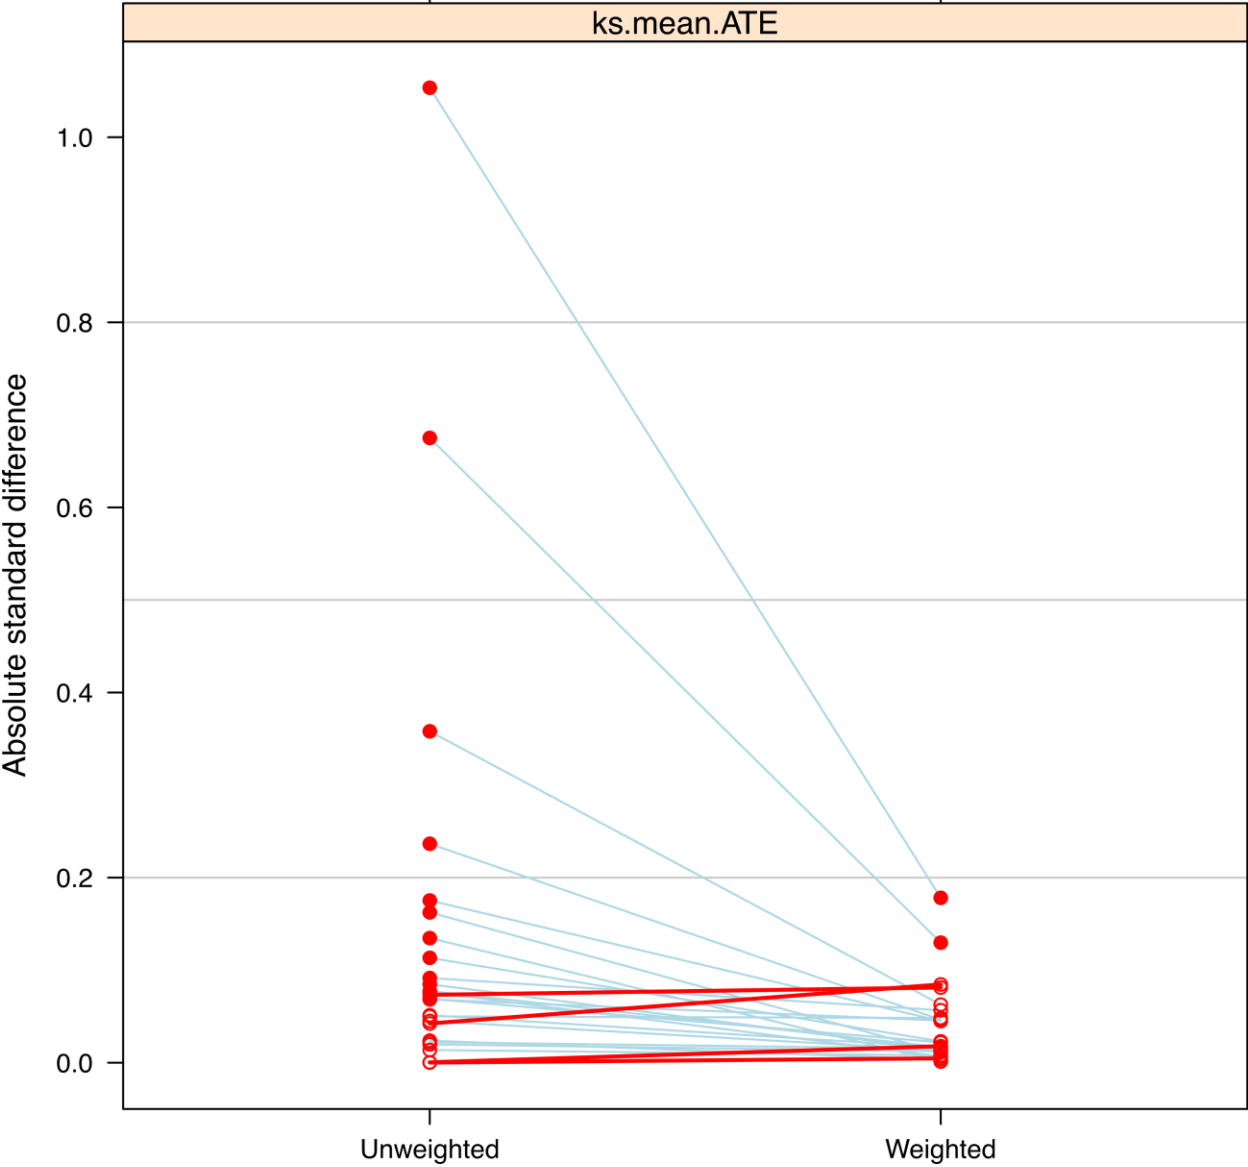

Supplementary Material Figure 4 – P-values of t-tests between group means of covariates.

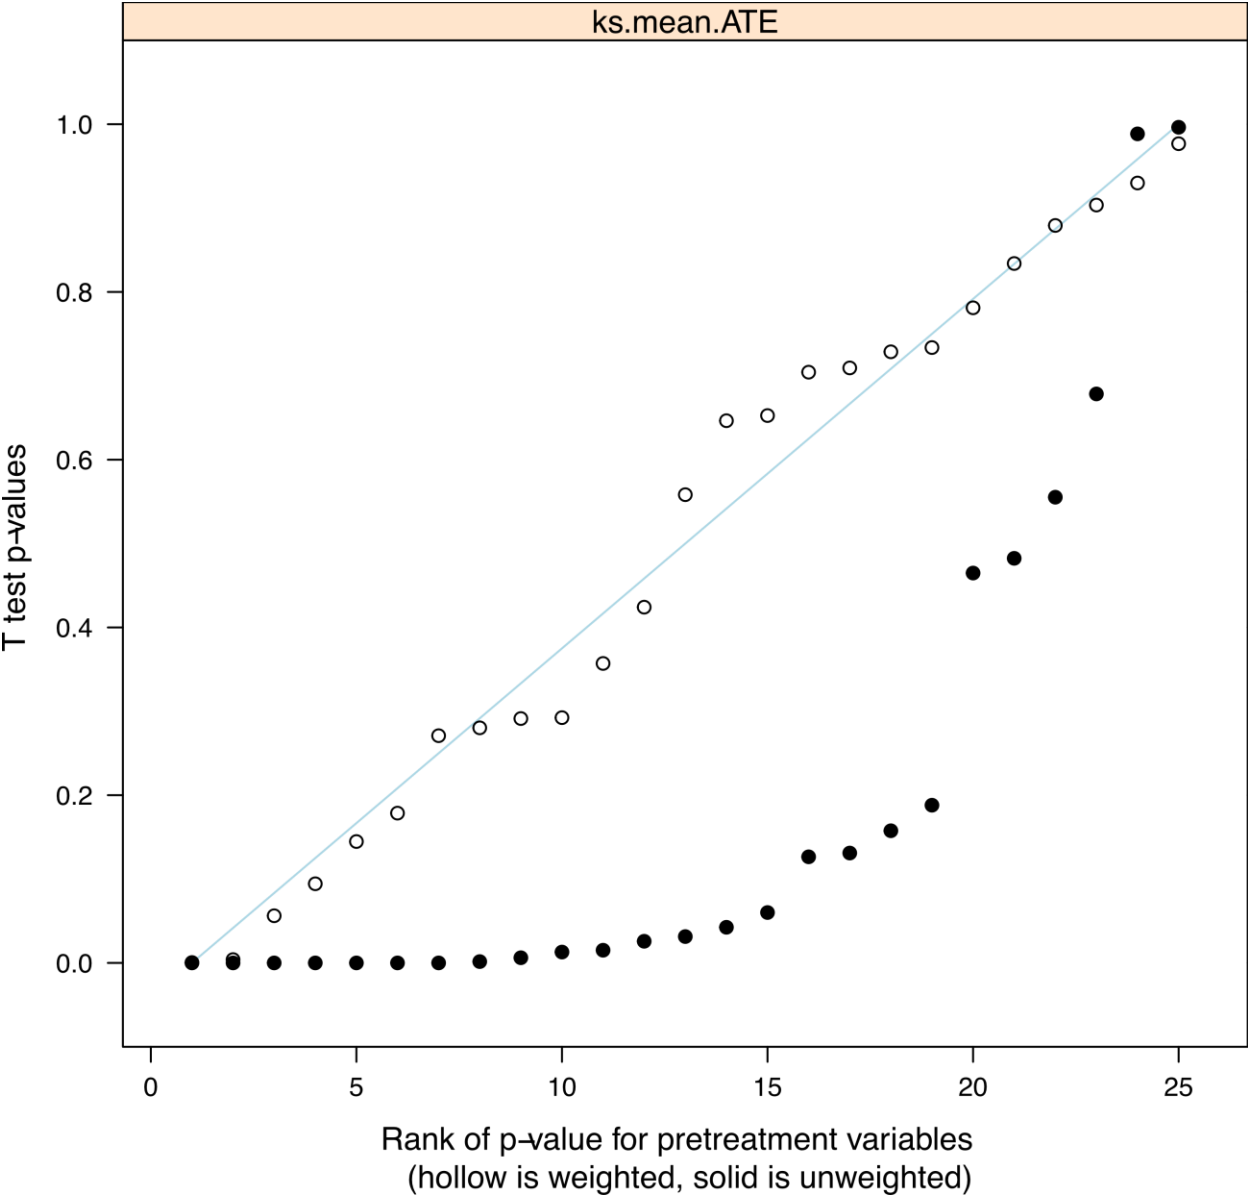

**Supplementary Material Figure 5** – Kolmogorov-Smirnov p-values for weighted and unweighted cohorts.

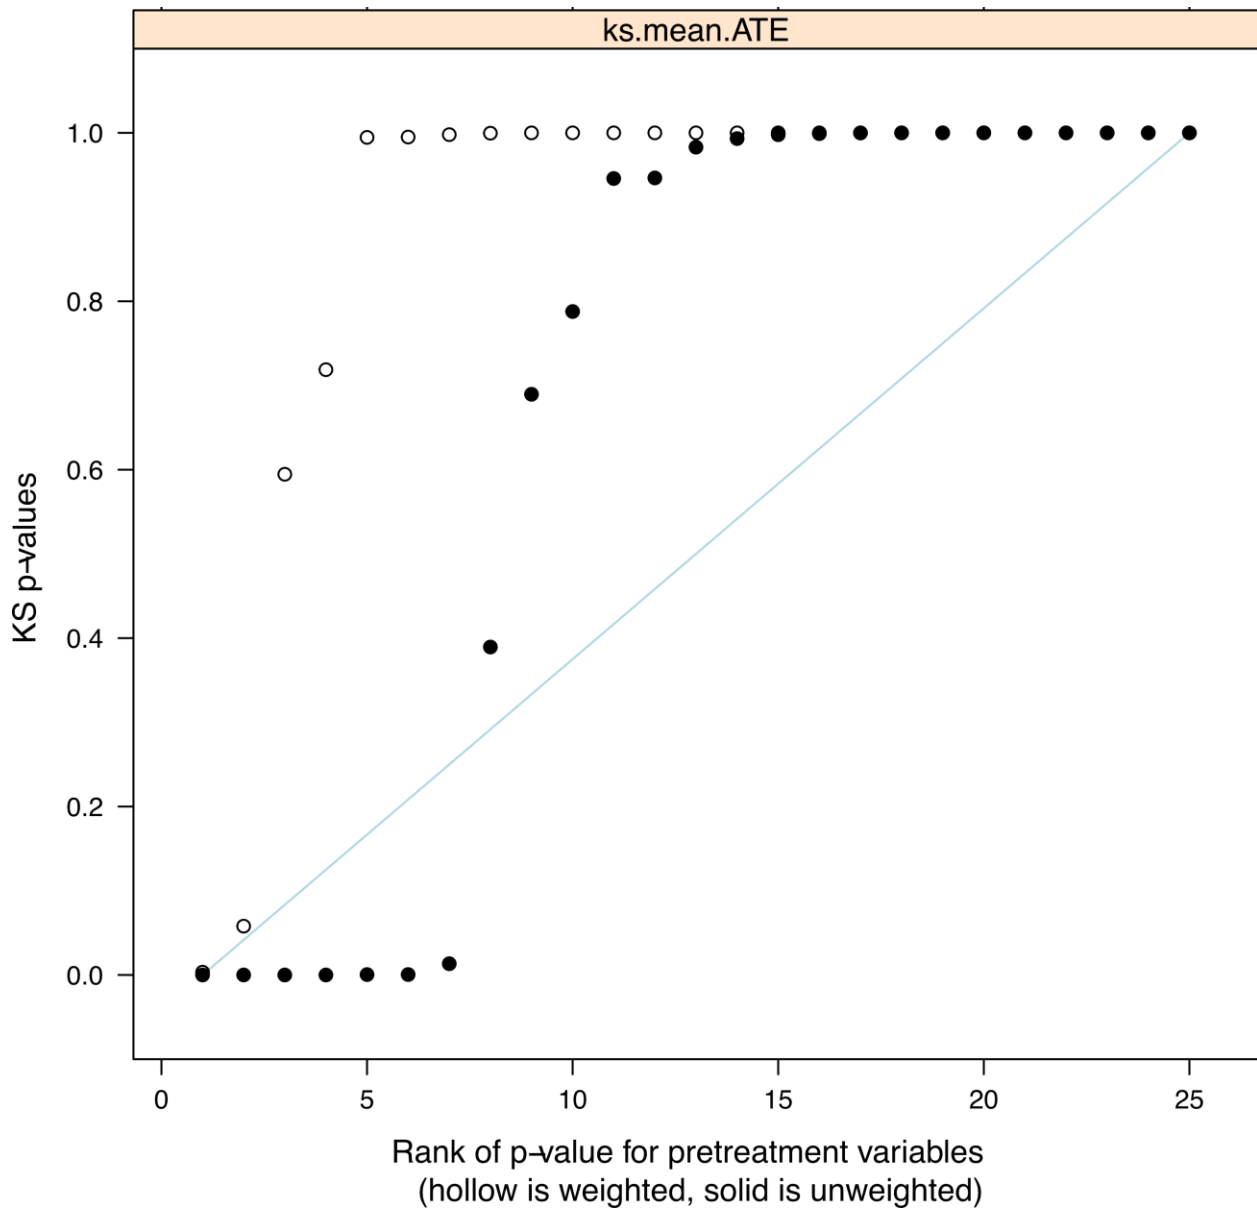

**Supplementary Material Figure 6** – Cumulative incidence of sepsis with death as a competing risk, landmarked at 180 days, stratified by procedure type. The statistically equivalent cumulative incidence of sepsis overtime suggest that the matched treatment groups were similar with respect to observed and unobserved confounders.

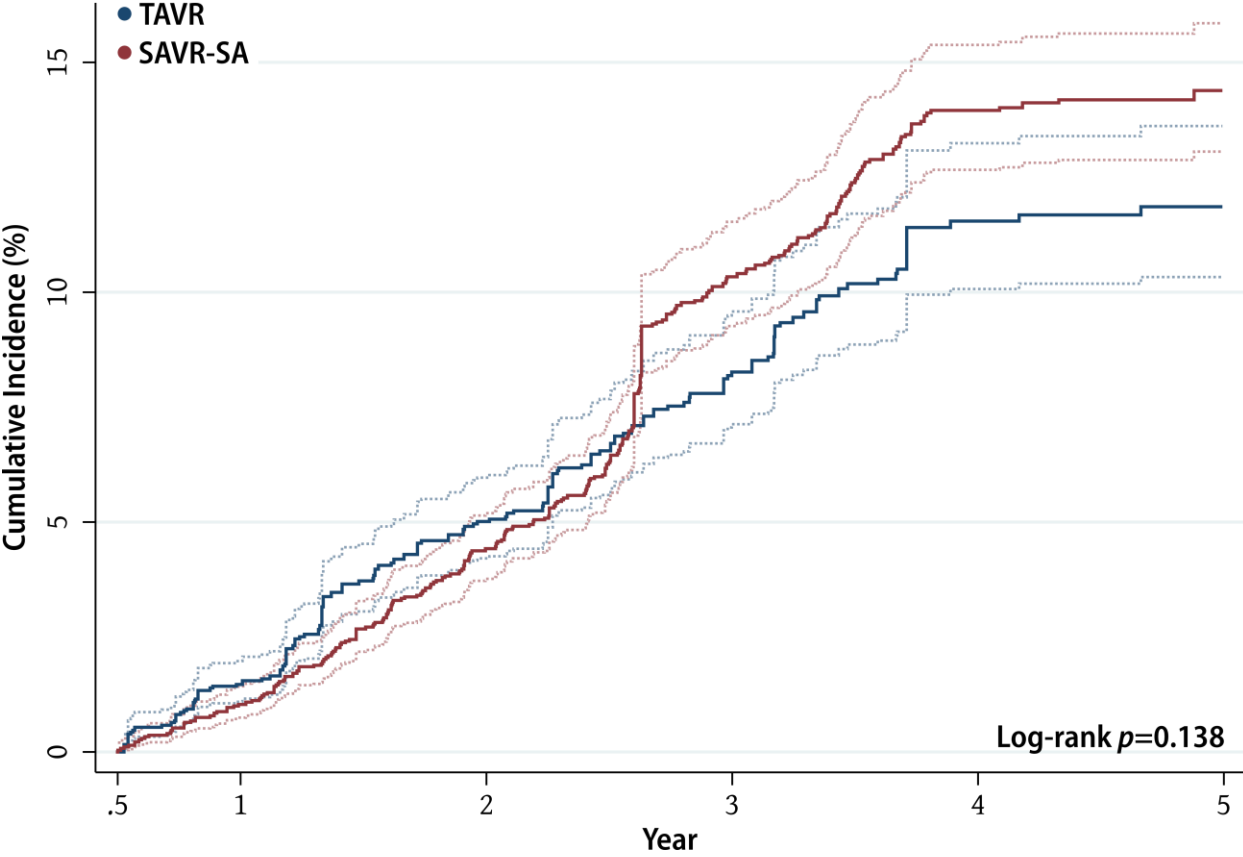

Supplement: MOESM1 [file 20272036]
